# Supplementary material
Source: PubMed Central journal article supplement (PMC2890756)
Supplement: 0914424107_pnas.0914424107_SI.pdf [file 0914424107_pnas.0914424107_SI.pdf]

# Supporting Information

Yuzenkova et al. 10.1073/pnas.0914424107

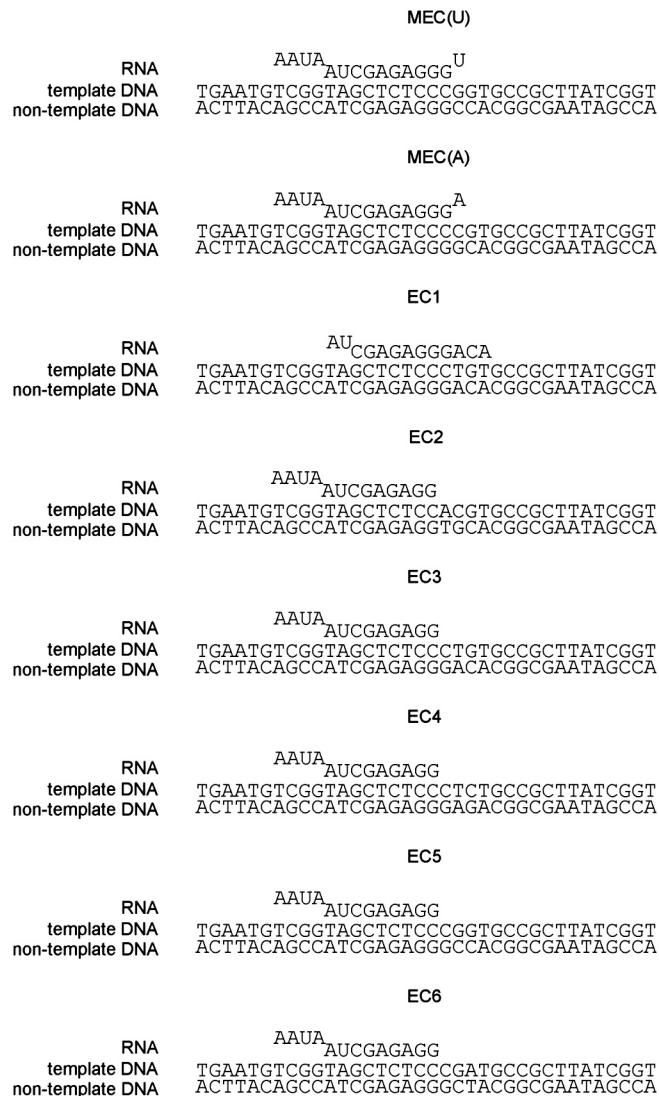

Fig. S1. Elongation complexes used in the study. Shown are the sequences of nucleic acid scaffolds used to assemble elongation complexes.



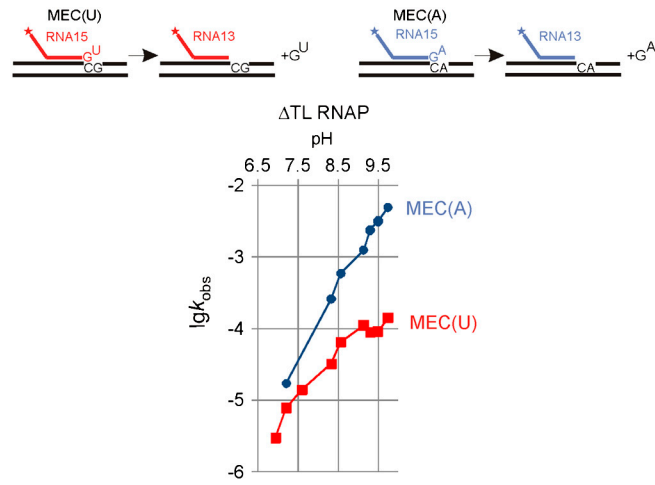

**Fig. S4.** pH profiles of second phosphodiester bond hydrolysis in MEC(U) (Red) and MEC(A) (Blue) complexes (colors correspond to reactions shown schematically above the plots) by  $\Delta$ TL RNAP.
